# Supplementary material
Source: PubMed Central journal article supplement (PMC55477)
Supplement: pnas_98_17_9478__15.pdf [file pnas_98_17_9478__15.pdf]

**Table 1.** Summary of  $^1\text{H}$  NMR [500 MHz,  $\text{CD}_3\text{CN}/\text{CDCl}_3$  (6:1), 283 K] data for **1**

|                         | No metal<br>$\delta$ , ppm | $\text{Na}^+$<br>$\delta$ , ppm | $\text{K}^+$<br>$\delta$ , ppm |
|-------------------------|----------------------------|---------------------------------|--------------------------------|
| $^t\text{But}$          | 1.12                       | 1.20 (+0.08)                    | 1.20 (+0.08)                   |
| ArH                     | 6.92                       | 7.32 (+0.40)                    | 7.31-7.36 (~+0.40)             |
| Heq                     | 3.15                       | 3.32 (+0.17)                    | 3.30 (+0.15)                   |
| Hax                     | 4.58                       | 4.18 (-0.40)                    | 4.29 (-0.29)                   |
| $\text{OCH}_2\text{CO}$ | 4.74                       | 4.39 (-0.25)                    | 4.60 (-0.14)                   |
| $\text{OCH}_2\text{CO}$ | 4.62                       | 4.28 (-0.34)                    | 4.08 (-0.54)                   |
| Val-NH                  | 7.67                       | 6.77 (-0.90)                    | 6.77 (-0.90)                   |
| Val-H $\alpha$          | 4.41                       | 4.63 (+0.22)                    | 4.60 (+0.19)                   |
| Val-H $\beta$           | 2.12                       | 2.18 (+0.06)                    | 2.15 (+0.03)                   |
| Val-H $\gamma$          | 0.84, 0.85                 | 0.82, 0.92 (+0.02, +0.07)       | 0.86, 0.96 (+0.02, +0.11)      |
| $\text{OCH}_2\text{Ph}$ | 5.05, 5.11                 | 5.02, 5.18 (-0.03, -0.07)       | 5.07, 5.15 (+0.02, +0.04)      |
| Ph                      | 7.28-7.33                  | 7.28-7.33 (~0)                  | 7.31-7.36 (~0)                 |
