# Supplementary material
Source: PubMed Central journal article supplement (PMC55477)
Supplement: pnas_98_17_9478__16.pdf [file pnas_98_17_9478__16.pdf]

**Table 2.** Summary of  $^1\text{H}$  NMR [500 MHz,  $\text{CD}_3\text{CN}/\text{CDCl}_3$  (6:1)] data between  $-20^\circ\text{C}$  and  $+55^\circ\text{C}$  for **1**

| No metal                | $-20^\circ\text{C}$<br>$\delta$ , ppm | $25^\circ\text{C}$<br>$\delta$ , ppm | $55^\circ\text{C}$<br>$\delta$ , ppm |
|-------------------------|---------------------------------------|--------------------------------------|--------------------------------------|
| $^1\text{But}$          | 1.11                                  | 1.11                                 | 1.12                                 |
| ArH                     | 6.99                                  | 6.91                                 | 6.99                                 |
| Heq                     | 3.14                                  | 3.16                                 | 3.17                                 |
| Hax                     | 4.54                                  | 4.62                                 | 4.63                                 |
| $\text{OCH}_2\text{CO}$ | 4.73                                  | 4.74                                 | 4.75                                 |
| $\text{OCH}_2\text{CO}$ | 4.57                                  | 4.61                                 | 4.67                                 |
| Val-NH                  | 7.83                                  | 7.63                                 | 7.49                                 |
| Val-H $\alpha$          | 4.39                                  | 4.42                                 | 4.39                                 |
| Val-H $\beta$           | 2.10                                  | 2.11                                 | 2.12                                 |
| Val-H $\gamma$          | 0.84, 0.85                            | 0.84, 0.85                           | 0.84, 0.88                           |
| $\text{OCH}_2\text{Ph}$ | 5.03, 5.09                            | 5.06, 5.10                           | 5.07, 5.11                           |
| Ph                      | 7.29-7.32                             | 7.29-7.32                            | 7.29-7.32                            |

  

| $\text{Na}^+$           | $-20^\circ\text{C}$<br>$\delta$ (ppm) | $25^\circ\text{C}$<br>$\delta$ (ppm) | $55^\circ\text{C}$<br>$\delta$ (ppm) |
|-------------------------|---------------------------------------|--------------------------------------|--------------------------------------|
| $^1\text{But}$          | 1.17                                  | 1.20                                 | 1.24                                 |
| ArH                     | 7.25-7.29                             | 7.28-7.33                            | 7.28-7.33                            |
| Heq                     | 3.32                                  | 3.32                                 | 3.32                                 |
| Hax                     | 4.14                                  | 4.20                                 | 4.23                                 |
| $\text{OCH}_2\text{CO}$ | 4.54                                  | 4.32                                 | 4.29                                 |
| $\text{OCH}_2\text{CO}$ | 4.10                                  | 4.34                                 | 4.44                                 |
| Val-NH                  | 6.86                                  | 6.75                                 | 6.67                                 |
| Val-H $\alpha$          | 4.68                                  | 4.62                                 | 4.61                                 |
| Val-H $\beta$           | 2.17                                  | 2.17                                 | 2.17                                 |
| Val-H $\gamma$          | 0.76, 0.90                            | 0.83, 0.92                           | 0.87, 0.94                           |
| $\text{OCH}_2\text{Ph}$ | 4.94, 5.13                            | 5.04, 5.16                           | 5.08, 5.18                           |
| Ph                      | 7.29-7.32                             | 7.28-7.33                            | 7.28-7.33                            |

  

| $\text{K}^+$            | $-20^\circ\text{C}$<br>$\delta$ (ppm) | $25^\circ\text{C}$<br>$\delta$ (ppm) | $55^\circ\text{C}$<br>$\delta$ (ppm) |
|-------------------------|---------------------------------------|--------------------------------------|--------------------------------------|
| $^1\text{But}$          | 1.18                                  | 1.22                                 | 1.23                                 |
| ArH                     | 7.29-7.34                             | 7.29-7.36                            | 7.29-7.37                            |
| Heq                     | 3.30                                  | 3.31                                 | 4.32                                 |
| Hax                     | 4.26                                  | 4.30                                 | 4.33                                 |
| $\text{OCH}_2\text{CO}$ | 4.52                                  | 4.61                                 | 4.64                                 |
| $\text{OCH}_2\text{CO}$ | 4.12                                  | 4.08                                 | 4.08                                 |
| Val-NH                  | 6.87                                  | 6.75                                 | 6.68                                 |
| Val-H $\alpha$          | 4.60                                  | 4.59                                 | 4.58                                 |
| Val-H $\beta$           | 2.15                                  | 2.17                                 | 2.19                                 |
| Val-H $\gamma$          | 0.81, 0.93                            | 0.88, 0.96                           | 0.91, 0.98                           |
| $\text{OCH}_2\text{Ph}$ | 5.04, 5.12                            | 5.10, 5.17                           | 5.12, 5.18                           |
| Ph                      | 7.29-7.34                             | 7.29-7.36                            | 7.29-7.37                            |
