# Supplementary material
Source: PubMed Central journal article supplement (PMC55477)
Supplement: pnas_98_17_9478__17.pdf [file pnas_98_17_9478__17.pdf]

**Table 3.** Summary of  $^1\text{H}$  NMR [500 MHz,  $\text{CD}_3\text{CN}/\text{CDCl}_3$  (2:1), 283 K] data for **2**

|                         | No metal<br>$\delta$ , ppm | $\text{Na}^+$<br>$\delta$ , ppm | $\text{K}^+$<br>$\delta$ , ppm |
|-------------------------|----------------------------|---------------------------------|--------------------------------|
| $^1\text{But}$          | 1.08                       | 1.17 (+0.09)                    | 1.18 (+0.10)                   |
| ArH                     | 6.85                       | 7.27-7.33 (~+0.40)              | 7.25-7.31 (~-0.40)             |
| Heq                     | 3.19                       | 3.36 (+0.25)                    | 3.35 (+0.24)                   |
| Hax                     | 4.63                       | 4.22 (-0.41)                    | 4.34 (-0.19)                   |
| $\text{OCH}_2\text{CO}$ | 4.68                       | 4.68 (0.00)                     | 4.71 (+0.03)                   |
| $\text{OCH}_2\text{CO}$ | 4.49                       | 4.09 (-0.40)                    | 4.07 (-0.42)                   |
| Val-NH                  | 7.98                       | 7.06 (-0.92)                    | 7.06 (-0.92)                   |
| Val-H $\alpha$          | 4.32                       | 4.33 (+0.01)                    | 4.34 (+0.02)                   |
| Val-H $\beta$           | 2.12                       | 2.11 (-0.01)                    | 2.11 (-0.01)                   |
| Val-H $\gamma$          | 0.86, 0.89                 | 0.86, 0.89 (0.00, 0.00)         | 0.91, 0.93 (+0.05, +0.04)      |
| Gly-NH                  | 7.62                       | 7.69 (+0.07)                    | 7.61 (-0.01)                   |
| Gly-H $\alpha$          | 3.83                       | 3.91 (-0.08)                    | 3.91 (-0.08)                   |
| Gly-H $\alpha'$         | 4.00                       | 4.00 (0.00)                     | 4.02 (0.00)                    |
| $\text{OCH}_2\text{Ph}$ | 5.08                       | 5.09, 5.10 (+0.01, +0.02)       | 5.07, 5.08 (-0.01, 0.00)       |
| Ph                      | 7.29-7.32                  | 7.27-7.33 (~0)                  | 7.25-7.33 (~0)                 |
