# Supplementary material
Source: PubMed Central journal article supplement (PMC55477)
Supplement: pnas_98_17_9478__18.pdf [file pnas_98_17_9478__18.pdf]

**Table 4.** Summary of  $^1\text{H}$  NMR [500 MHz,  $\text{CD}_3\text{CN}/\text{CDCl}_3$  (2:1)] data between  $-20^\circ\text{C}$  and  $+55^\circ\text{C}$  for **2**

| No metal                | $-20^\circ\text{C}$<br>$\delta$ , ppm | $25^\circ\text{C}$<br>$\delta$ , ppm | $55^\circ\text{C}$<br>$\delta$ , ppm |
|-------------------------|---------------------------------------|--------------------------------------|--------------------------------------|
| $^1\text{But}$          | 1.07                                  | 1.08                                 | 1.09                                 |
| ArH                     | 6.90                                  | 6.90                                 | 6.84                                 |
| Heq                     | 3.19                                  | 3.19                                 | 3.20                                 |
| Hax                     | 4.63                                  | 4.63                                 | 4.63                                 |
| $\text{OCH}_2\text{CO}$ | 4.70                                  | 4.65                                 | 4.65                                 |
| $\text{OCH}_2\text{CO}$ | 4.44                                  | 4.50                                 | 4.53                                 |
| Val-NH                  | 8.12                                  | 7.94                                 | 7.80                                 |
| Val-H $\alpha$          | 4.31                                  | 4.32                                 | 4.32                                 |
| Val-H $\beta$           | 2.10                                  | 2.12                                 | 2.14                                 |
| Val-H $\gamma$          | 0.85, 0.90                            | 0.86, 0.89                           | 0.87, 0.90                           |
| Gly-NH                  | 7.75                                  | 7.58                                 | 7.46                                 |
| Gly-H $\alpha$          | 3.97                                  | 4.00                                 | 4.01                                 |
| Gly-H $\alpha'$         | 3.78                                  | 3.84                                 | 3.87                                 |
| $\text{OCH}_2\text{Ph}$ | 5.04                                  | 5.08                                 | 5.11                                 |
| Ph                      | 7.28-7.30                             | 7.29-7.33                            | 7.29-7.33                            |

  

| $\text{Na}^+$           | $-20^\circ\text{C}$<br>$\delta$ (ppm) | $25^\circ\text{C}$<br>$\delta$ (ppm) | $55^\circ\text{C}$<br>$\delta$ (ppm) |
|-------------------------|---------------------------------------|--------------------------------------|--------------------------------------|
| $^1\text{But}$          | 1.15                                  | 1.19                                 | 1.19                                 |
| ArH                     | 7.20-7.32                             | 7.27-7.33                            | 7.29-7.34                            |
| Heq                     | 3.33                                  | 3.37                                 | 3.38                                 |
| Hax                     | 4.17                                  | 4.23                                 | 4.28                                 |
| $\text{OCH}_2\text{CO}$ | 4.62                                  | 4.68                                 | 4.70                                 |
| $\text{OCH}_2\text{CO}$ | 4.09                                  | 4.10                                 | 4.14                                 |
| Val-NH                  | 7.21                                  | 7.02                                 | 6.93                                 |
| Val-H $\alpha$          | 4.30                                  | 4.34                                 | 4.37                                 |
| Val-H $\beta$           | 2.06                                  | 2.09                                 | 2.11                                 |
| Val-H $\gamma$          | 0.86, 0.88                            | 0.90, 0.92                           | 0.92, 0.94                           |
| Gly-NH                  | 7.85                                  | 7.65                                 | 7.53                                 |
| Gly-H $\alpha$          | 3.93                                  | 3.98                                 | 4.01                                 |
| Gly-H $\alpha'$         | 3.90                                  | 3.92                                 | 3.97                                 |
| $\text{OCH}_2\text{Ph}$ | 5.07                                  | 5.11                                 | 5.13                                 |
| Ph                      | 7.21-7.33                             | 7.27-7.33                            | 7.27-7.33                            |

  

| $\text{K}^+$            | $-20^\circ\text{C}$<br>$\delta$ (ppm) | $25^\circ\text{C}$<br>$\delta$ (ppm) | $55^\circ\text{C}$<br>$\delta$ (ppm) |
|-------------------------|---------------------------------------|--------------------------------------|--------------------------------------|
| $^1\text{But}$          | 1.15                                  | 1.18                                 | 1.20                                 |
| ArH                     | 7.25-7.31                             | 7.27-7.31                            | 7.26-7.33                            |
| Heq                     | 3.33                                  | 3.36                                 | 3.37                                 |
| Hax                     | 4.29                                  | 4.34                                 | 4.39                                 |
| $\text{OCH}_2\text{CO}$ | 4.69                                  | 4.70                                 | 4.69                                 |
| $\text{OCH}_2\text{CO}$ | 4.01                                  | 4.06                                 | 4.14                                 |
| Val-NH                  | 7.15                                  | 7.04                                 | 6.98                                 |
| Val-H $\alpha$          | 4.30                                  | 4.34                                 | 4.37                                 |
| Val-H $\beta$           | 2.09                                  | 2.11                                 | 2.13                                 |
| Val-H $\gamma$          | 0.88, 0.90                            | 0.91, 0.93                           | 0.94, 0.96                           |
| Gly-NH                  | 7.80                                  | 7.57                                 | 7.42                                 |
| Gly-H $\alpha$          | 3.89                                  | 3.94                                 | 3.97                                 |
| Gly-H $\alpha'$         | 4.00                                  | 4.02                                 | 4.04                                 |
| $\text{OCH}_2\text{Ph}$ | 5.07, 5.08                            | 5.11                                 | 5.14                                 |
| Ph                      | 7.25-7.31                             | 7.27-7.33                            | 7.27-7.33                            |
