# Supplementary material
Source: PubMed Central journal article supplement (PMC55477)
Supplement: pnas_98_17_9478__19.pdf [file pnas_98_17_9478__19.pdf]

**Table 5.** Summary of  $^1\text{H}$  NMR [500 MHz,  $\text{CD}_3\text{CN}$ , 283 K] data for **3**

|                         | No metal<br>$\delta$ , ppm | $\text{Na}^+$<br>$\delta$ , ppm | $\text{K}^+$<br>$\delta$ , ppm |
|-------------------------|----------------------------|---------------------------------|--------------------------------|
| $^i\text{But}$          | 1.02                       | 1.15 (+0.13)                    | 1.18 (+0.16)                   |
| ArH                     | 6.79, 6.82                 | 7.21-7.32 (~+0.40)              | 7.25-7.34 (~+0.40)             |
| Heq                     | 3.13                       | 3.28 (+0.15)                    | 3.34 (+0.21)                   |
| Hax                     | 4.51                       | 4.15 (-0.36)                    | 4.34 (-0.17)                   |
| $\text{OCH}_2\text{CO}$ | 4.63                       | 4.47 (-0.16)                    | 4.72 (+0.09)                   |
| $\text{OCH}_2\text{CO}$ | 4.51                       | 4.15 (-0.36)                    | 4.06 (-0.45)                   |
| Val-NH                  | 8.25                       | 7.18 (-1.07)                    | 7.14 (-1.01)                   |
| Val-H $\alpha$          | 4.31                       | 4.25 (-0.06)                    | 4.33 (+0.02)                   |
| Val-H $\beta$           | 2.15                       | 1.95 (-0.20)                    | 2.10 (-0.05)                   |
| Val-H $\gamma$          | 0.83, 0.87                 | 0.84, 0.87 (+0.01, 0.00)        | 0.88, 0.91 (+0.05, 0.04)       |
| Gly-NH                  | 7.84                       | 8.19 (+0.35)                    | 7.88 (+0.04)                   |
| Gly-H $\alpha$          | 3.43                       | 3.73 (+0.30)                    | 3.84 (+0.41)                   |
| Gly-H $\alpha'$         | 3.81                       | 3.96 (+0.15)                    | 3.85 (+0.04)                   |
| Tyr-NH                  | 7.31                       | 7.66 (+0.35)                    | 7.34 (+0.03)                   |
| Tyr-H $\alpha$          | 4.63                       | 4.72 (+0.09)                    | 4.68 (+0.05)                   |
| Tyr-H $\beta$           | 2.84                       | 2.83 (-0.01)                    | 2.88 (+0.04)                   |
| Tyr-H $\beta'$          | 2.94                       | 2.93 (-0.01)                    | 2.94 (0.00)                    |
| Tyr-ArH(3,5)            | 6.61                       | 6.61 (0.00)                     | 6.64 (+0.03)                   |
| Tyr-ArH(2,6)            | 6.90                       | 6.85 (-0.05)                    | 6.89 (-0.01)                   |
| $\text{OCH}_2\text{Ph}$ | 5.03, 5.04                 | 5.01, 5.13 (-0.02, +0.09)       | 5.00, 5.04 (+0.03, 0.00)       |
| Ph                      | 7.18-7.31                  | 7.21-7.32 (~0.00)               | 7.25-7.34 (~0.00)              |
