# Supplementary material
Source: PubMed Central journal article supplement (PMC55477)
Supplement: pnas_98_17_9478__20.pdf [file pnas_98_17_9478__20.pdf]

**Table 6.** Summary of  $^1\text{H}$  NMR (500 MHz,  $\text{CD}_3\text{CN}$ ) data between  $-20^\circ\text{C}$  and  $+55^\circ\text{C}$  for **3**

| No metal                | $-20^\circ\text{C}$<br>$\delta$ , ppm | $25^\circ\text{C}$<br>$\delta$ , ppm | $55^\circ\text{C}$<br>$\delta$ , ppm |
|-------------------------|---------------------------------------|--------------------------------------|--------------------------------------|
| $^t\text{But}$          | 1.00                                  | 1.03                                 | 1.06                                 |
| ArH                     | 6.88                                  | 6.80, 6.82                           | 6.83, 6.84                           |
| Heq                     | 3.11                                  | 3.14                                 | 3.17                                 |
| Hax                     | 4.54                                  | 4.64                                 | 4.60                                 |
| $\text{OCH}_2\text{CO}$ | 4.58                                  | 4.64                                 | 4.69                                 |
| $\text{OCH}_2\text{CO}$ | 4.58                                  | 4.52                                 | 4.54                                 |
| Val-NH                  | 8.40                                  | 8.20                                 | 7.98                                 |
| Val-H $\alpha$          | 4.26                                  | 4.31                                 | 4.31                                 |
| Val-H $\beta$           | 2.10                                  | 2.15                                 | 2.16                                 |
| Val-H $\gamma$          | 0.81, 0.85                            | 0.84, 0.88                           | 0.86, 0.89                           |
| Gly-NH                  | 7.98                                  | 7.80                                 | 7.64                                 |
| Gly-H $\alpha$          | 3.38                                  | 3.47                                 | 3.61                                 |
| Gly-H $\alpha'$         | 3.78                                  | 3.82                                 | 3.84                                 |
| Tyr-NH                  | 7.46                                  | 7.32                                 | 7.16                                 |
| Tyr-H $\alpha$          | 4.50                                  | 4.64                                 | 4.58                                 |
| Tyr-H $\beta$           | 2.82                                  | 2.84                                 | 2.89                                 |
| Tyr-H $\beta'$          | 2.92                                  | 2.95                                 | 2.97                                 |
| Tyr-ArH(3,5)            | 6.60                                  | 6.63                                 | 6.65                                 |
| Tyr-ArH(2,6)            | 6.88                                  | 6.90                                 | 6.92                                 |
| $\text{OCH}_2\text{Ph}$ | 5.01, 5.01                            | 5.04, 5.04                           | 5.05, 5.05                           |
| Ph                      | 7.20-7.30                             | 7.26-7.32                            | 7.26-7.32                            |

| $\text{Na}^+$           | $-20^\circ\text{C}$<br>$\delta$ (ppm) | $25^\circ\text{C}$<br>$\delta$ (ppm) | $55^\circ\text{C}$<br>$\delta$ (ppm) |
|-------------------------|---------------------------------------|--------------------------------------|--------------------------------------|
| $^t\text{But}$          | 1.11                                  | 1.17                                 | 1.28                                 |
| ArH                     | 7.18-7.31                             | 7.16-7.33                            | 7.10-7.33                            |
| Heq                     | 3.21                                  | 3.32                                 | 3.34                                 |
| Hax                     | 4.09                                  | 4.19                                 | 4.21                                 |
| $\text{OCH}_2\text{CO}$ | 4.40                                  | 4.53                                 | 4.55                                 |
| $\text{OCH}_2\text{CO}$ | 4.08                                  | 4.18                                 | 4.21                                 |
| Val-NH                  | 7.41                                  | 6.98                                 | 6.90                                 |
| Val-H $\alpha$          | 4.20                                  | 4.30                                 | 4.31                                 |
| Val-H $\beta$           | 1.94                                  | 1.96                                 | 2.00                                 |
| Val-H $\gamma$          | 0.79, 0.80                            | 0.86, 0.87                           | 0.87, 0.88                           |
| Gly-NH                  | 8.37                                  | 8.00                                 | 7.93                                 |
| Gly-H $\alpha$          | 3.66                                  | 3.80                                 | 3.80                                 |
| Gly-H $\alpha'$         | 3.94                                  | 3.97                                 | 3.97                                 |
| Tyr-NH                  | 7.86                                  | 7.47                                 | 7.40                                 |
| Tyr-H $\alpha$          | 4.53                                  | 4.75                                 | 4.75                                 |
| Tyr-H $\beta$           | 2.75                                  | 2.89                                 | 2.89                                 |
| Tyr-H $\beta'$          | 2.88                                  | 2.96                                 | 2.96                                 |
| Tyr-ArH(3,5)            | 6.59                                  | 6.64                                 | 6.64                                 |
| Tyr-ArH(2,6)            | 6.79                                  | 6.88                                 | 6.90                                 |
| $\text{OCH}_2\text{Ph}$ | 5.00, 5.14                            | 5.02, 5.12                           | 5.02, 5.12                           |
| Ph                      | 7.18-7.31                             | 7.16-7.33                            | 7.10-7.33                            |

| $\text{K}^+$            | $-20^\circ\text{C}$<br>$\delta$ (ppm) | $25^\circ\text{C}$<br>$\delta$ (ppm) | $55^\circ\text{C}$<br>$\delta$ (ppm) |
|-------------------------|---------------------------------------|--------------------------------------|--------------------------------------|
| $^t\text{But}$          | 1.15                                  | 1.19                                 | 1.21                                 |
| ArH                     | 7.18-7.31                             | 7.16-7.33                            | 7.10-7.33                            |
| Heq                     | 3.32                                  | 3.35                                 | 3.37                                 |
| Hax                     | 4.29                                  | 4.19                                 | 4.21                                 |
| $\text{OCH}_2\text{CO}$ | 4.77                                  | 4.71                                 | 4.67                                 |

---

|                     |            |            |            |
|---------------------|------------|------------|------------|
| OCH <sub>2</sub> CO | 4.02       | 4.07       | 4.17       |
| Val-NH              | 7.45       | 7.21       | 7.08       |
| Val-H $\alpha$      | 4.30       | 4.34       | 4.36       |
| Val-H $\beta$       | 2.11       | 2.10       | 2.12       |
| Val-H $\gamma$      | 0.85, 0.87 | 0.89, 0.92 | 0.91, 0.94 |
| Gly-NH              | 8.02       | 7.83       | 7.67       |
| Gly-H $\alpha$      | 3.79       | 3.86       | 3.88       |
| Gly-H $\alpha'$     | 3.79       | 3.87       | 3.88       |
| Tyr-NH              | 7.60       | 7.13       | 7.08       |
| Tyr-H $\alpha$      | 4.67       | 4.69       | 4.70       |
| Tyr-H $\beta$       | 2.87       | 2.91       | 2.92       |
| Tyr-H $\beta'$      | 2.88       | 2.94       | 2.98       |
| Tyr-ArH(3,5)        | 6.62       | 6.65       | 6.62       |
| Tyr-ArH(2,6)        | 6.86       | 6.89       | 6.91       |
| OCH <sub>2</sub> Ph | 5.00, 5.00 | 5.03, 5.03 | 5.05, 5.05 |
| Ph                  | 7.20-7.30  | 7.26-7.33  | 7.26-7.33  |

---
