# Supplementary material
Source: PubMed Central journal article supplement (PMC55477)
Supplement: pnas_98_17_9478__21.pdf [file pnas_98_17_9478__21.pdf]

**Table 7.** Temperature and metal dependence of the valine amide proton chemical shifts in **1**

| T, K | $\delta$ , ppm,<br>No metal | $\delta$ , ppm,<br>Na <sup>+</sup> | $\delta$ , ppm,<br>K <sup>+</sup> |
|------|-----------------------------|------------------------------------|-----------------------------------|
| 253  | 7.83                        | 6.86                               | 6.87                              |
| 258  | 7.81                        | 6.85                               | 6.85                              |
| 268  | 7.76                        | 6.82                               | 6.83                              |
| 278  | 7.72                        | 6.8                                | 6.80                              |
| 288  | 7.66                        | 6.77                               | 6.70                              |
| 298  | 7.63                        | 6.75                               | 6.75                              |
| 308  | 7.58                        | 6.72                               | 6.73                              |
| 318  | 7.55                        | 6.7                                | 6.70                              |
| 328  | 7.49                        | 6.67                               | 6.69                              |
