# Supplementary material
Source: PubMed Central journal article supplement (PMC55477)
Supplement: pnas_98_17_9478__22.pdf [file pnas_98_17_9478__22.pdf]

**Table 8.** Temperature and metal dependence of the valine and glycine amide proton chemical shifts in **2**

| T, K | Val N-H $\delta$ ,<br>ppm<br>No metal | Gly N-H $\delta$ ,<br>ppm<br>No metal | Val N-H $\delta$ ,<br>ppm, Na <sup>+</sup> | Gly N-H $\delta$ ,<br>ppm, Na <sup>+</sup> | Val N-H $\delta$ ,<br>ppm, K <sup>+</sup> | Gly N-H $\delta$ ,<br>ppm, K <sup>+</sup> |
|------|---------------------------------------|---------------------------------------|--------------------------------------------|--------------------------------------------|-------------------------------------------|-------------------------------------------|
| 253  | 8.12                                  | 7.75                                  | 7.22                                       | 7.86                                       | 7.15                                      | 7.8                                       |
| 258  | 8.1                                   | 7.73                                  | 7.21                                       | 7.83                                       | 7.14                                      | 7.77                                      |
| 268  | 8.07                                  | 7.7                                   | 7.15                                       | 7.78                                       | 7.11                                      | 7.73                                      |
| 278  | 8.02                                  | 7.66                                  | 7.09                                       | 7.55                                       | 7.08                                      | 7.66                                      |
| 288  | 7.98                                  | 7.62                                  | 7.05                                       | 7.69                                       | 7.06                                      | 7.61                                      |
| 298  | 7.94                                  | 7.58                                  | 7.02                                       | 7.65                                       | 7.04                                      | 7.57                                      |
| 308  | 7.89                                  | 7.54                                  | 7                                          | 7.61                                       | 7.02                                      | 7.53                                      |
| 318  | 7.84                                  | 7.5                                   | 6.96                                       | 7.57                                       | 7                                         | 7.47                                      |
| 328  | 7.81                                  | 7.46                                  | 6.93                                       | 7.52                                       | 6.98                                      | 7.42                                      |
