# Supplementary material
Source: PubMed Central journal article supplement (PMC55477)
Supplement: pnas_98_17_9478__23.pdf [file pnas_98_17_9478__23.pdf]

**Table 9.** Temperature and metal dependence of the valine and glycine amide proton chemical shifts in **3**

| T, K | Val N-H<br>$\delta$ , ppm<br>No metal | Gly N-H<br>$\delta$ , ppm<br>No metal | Tyr N-H<br>$\delta$ , ppm<br>No metal | Val N-H<br>$\delta$ , ppm,<br>Na <sup>+</sup> | Gly N-H<br>$\delta$ , ppm,<br>Na <sup>+</sup> | Tyr N-H<br>$\delta$ , ppm,<br>Na <sup>+</sup> | Val N-H<br>$\delta$ , ppm,<br>K <sup>+</sup> | Gly N-H<br>$\delta$ , ppm,<br>K <sup>+</sup> | Tyr N-H<br>$\delta$ (ppm),<br>K <sup>+</sup> |
|------|---------------------------------------|---------------------------------------|---------------------------------------|-----------------------------------------------|-----------------------------------------------|-----------------------------------------------|----------------------------------------------|----------------------------------------------|----------------------------------------------|
| 253  | 8.4                                   | 7.97                                  | 7.46                                  | 7.59                                          | 8.37                                          | 7.88                                          | 7.3                                          | 8.02                                         | 7.45                                         |
| 258  | 8.37                                  | 7.96                                  | 7.44                                  | 7.48                                          | 8.34                                          | 7.8                                           | 7.21                                         | 8                                            | 7.42                                         |
| 268  | 8.32                                  | 7.92                                  | 7.4                                   | 7.42                                          | 8.3                                           | 7.78                                          | 7.17                                         | 7.96                                         | 7.35                                         |
| 278  | 8.28                                  | 7.88                                  | 7.37                                  | 7.35                                          | 8.24                                          | 7.73                                          | 7.15                                         | 7.92                                         | 7.32                                         |
| 288  | 8.25                                  | 7.84                                  | 7.32                                  | 7.18                                          | 8.19                                          | 7.66                                          | 7.14                                         | 7.88                                         | 7.27                                         |
| 298  | 8.19                                  | 7.79                                  | 7.16                                  | 7.14                                          | 8.15                                          | 7.62                                          | 7.13                                         | 7.83                                         | 7.21                                         |
| 308  | 8.13                                  | 7.75                                  | 7.02                                  | 7.05                                          | 8.07                                          | 7.54                                          | 7.11                                         | 7.78                                         | 7.17                                         |
| 318  | 8.09                                  | 7.71                                  | 6.99                                  | 6.98                                          | 8.00                                          | 7.47                                          | 7.09                                         | 7.73                                         | 7.12                                         |
| 328  | 7.98                                  | 7.64                                  | 6.9                                   | 6.92                                          | 7.94                                          | 7.41                                          | 7.08                                         | 7.67                                         | 7.08                                         |
