# Supplementary material
Source: PubMed Central journal article supplement (PMC55477)

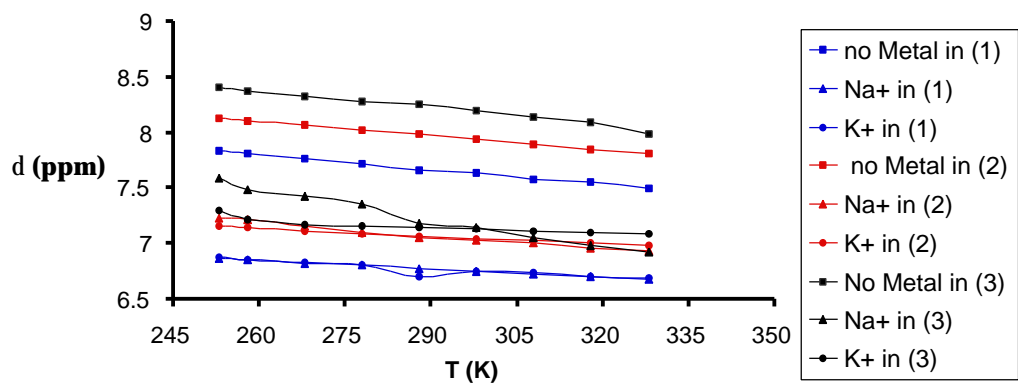

Supplement: pnas_98_17_9478__10.pdf [file pnas_98_17_9478__10.pdf]

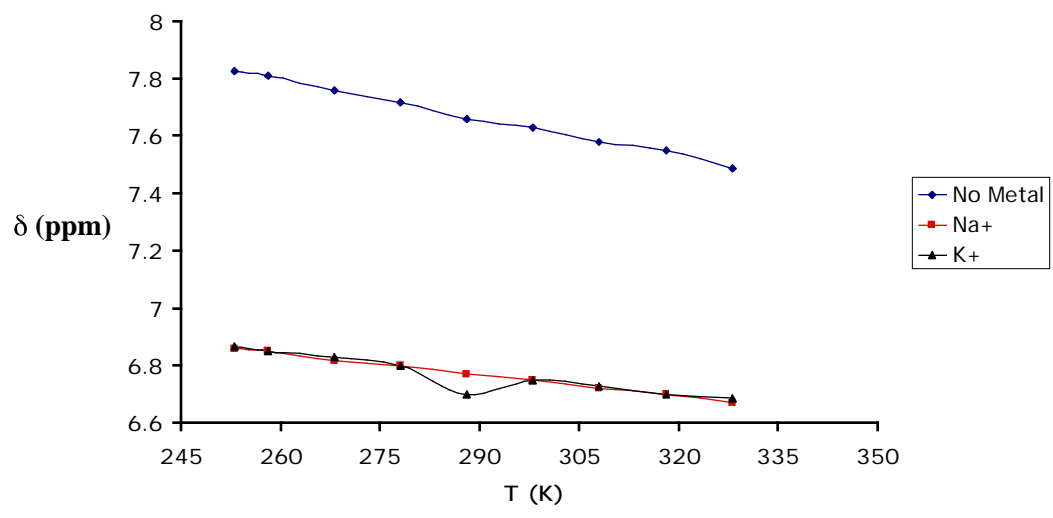

Supplement: pnas_98_17_9478__11.pdf [file pnas_98_17_9478__11.pdf]

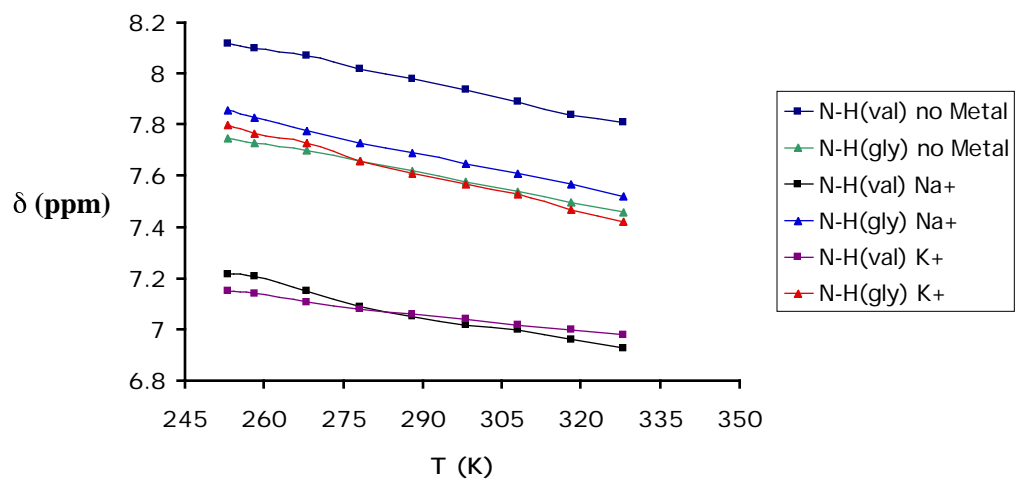

Supplement: pnas_98_17_9478__12.pdf [file pnas_98_17_9478__12.pdf]

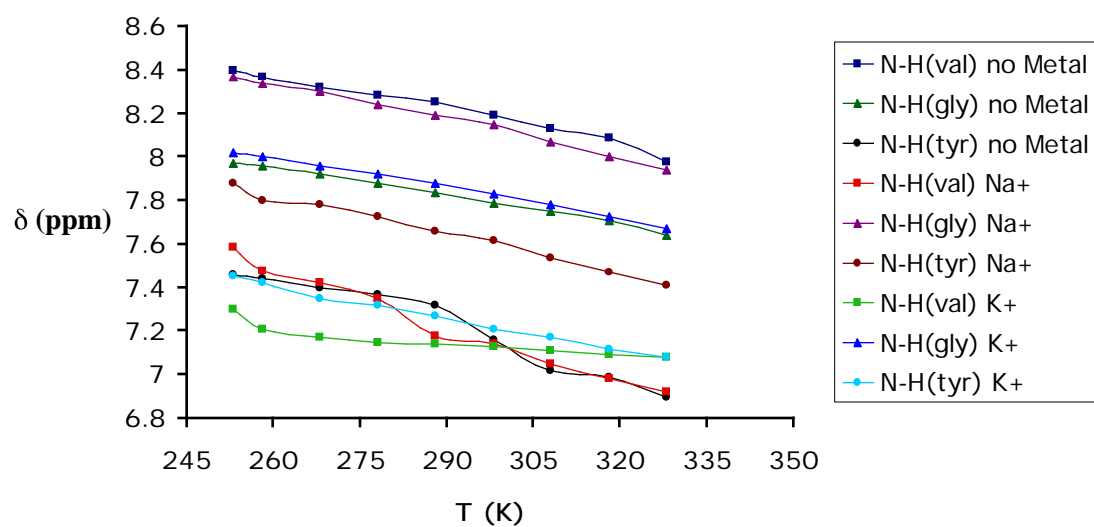

Supplement: pnas_98_17_9478__13.pdf [file pnas_98_17_9478__13.pdf]

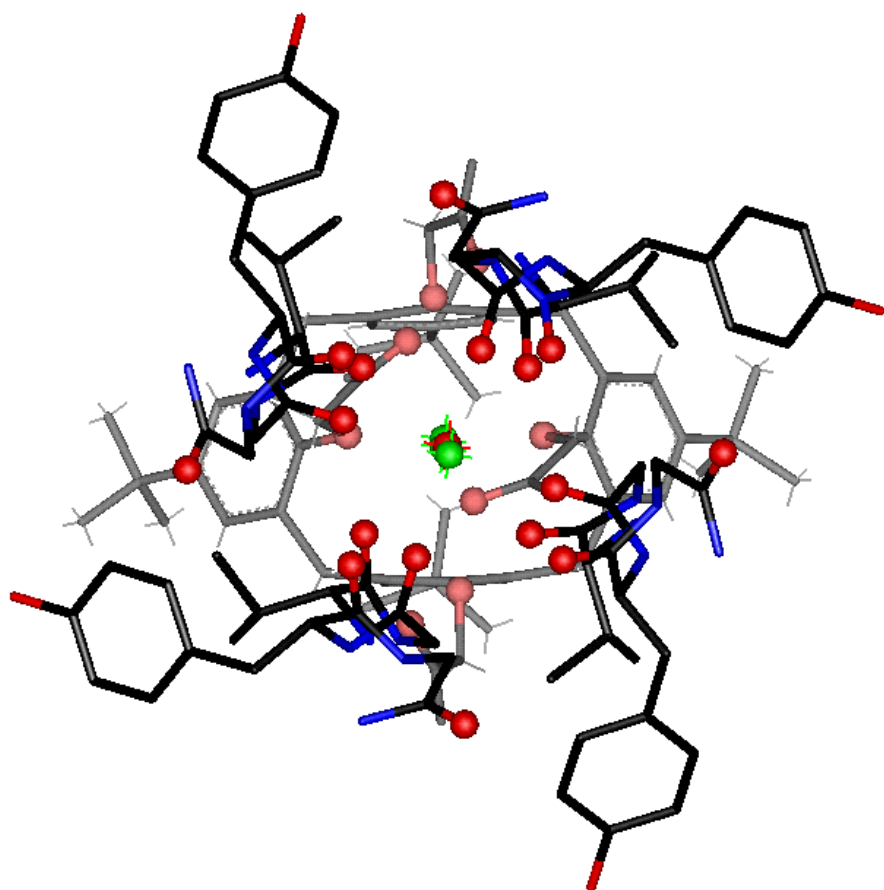

Supplement: pnas_98_17_9478__14.pdf [file pnas_98_17_9478__14.pdf]

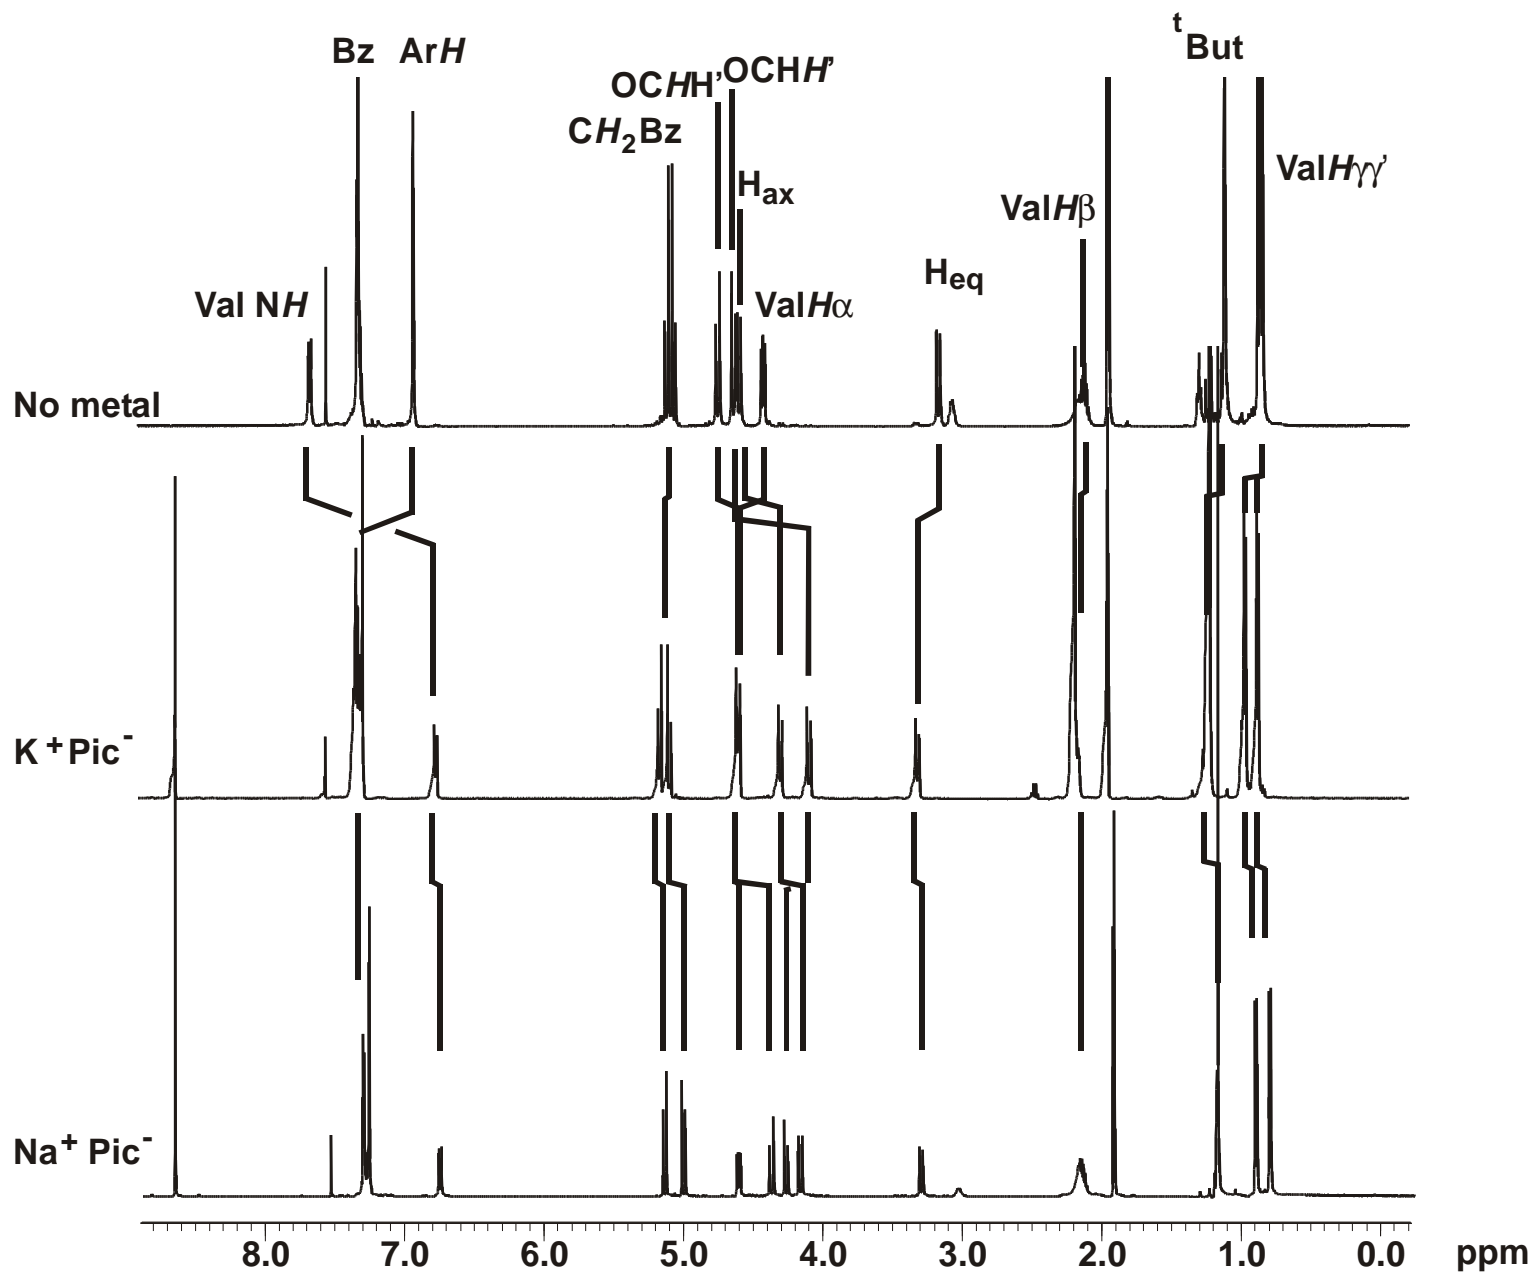

Supplement: pnas_98_17_9478__8.pdf [file pnas_98_17_9478__8.pdf]

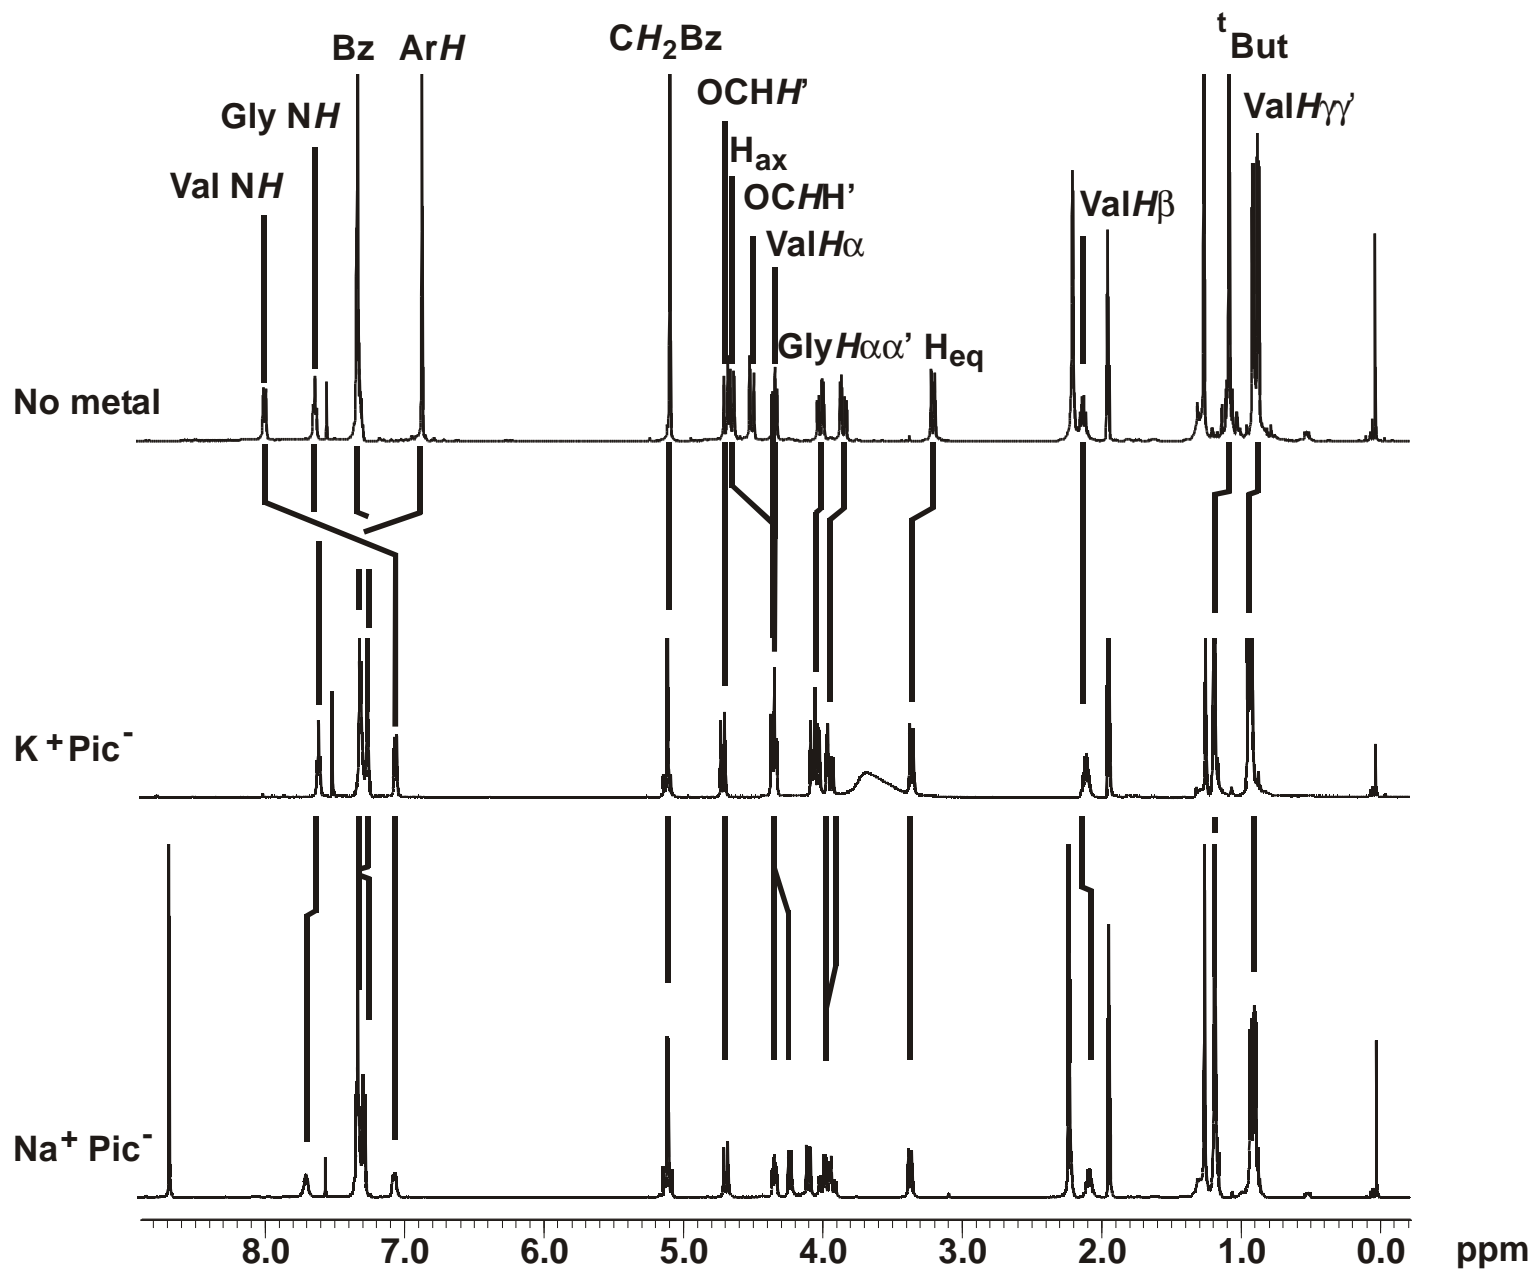

Supplement: pnas_98_17_9478__9.pdf [file pnas_98_17_9478__9.pdf]
